# Supplementary material for: CX-4945 and siRNA-Mediated Knockdown of CK2 Improves Cisplatin Response in HPV(+) and HPV(−) HNSCC Cell Lines
Source: MDPI journal article supplement (doi:10.3390/biomedicines9050571), 2021-05-18
Supplement: s1 [file s1]

**Table S1.** Quantitation of HNSCC cell line immunoblot signals<sup>1</sup>.

| Cell Line   | CK2 $\alpha$ | CK2 $\alpha'$ | CK2 $\beta$ | NF $\kappa$ B p65 | NF $\kappa$ B p65 P-S529 | AKT-1 | AKT-1 P-S129 | p53    | pRb    |
|-------------|--------------|---------------|-------------|-------------------|--------------------------|-------|--------------|--------|--------|
| HEKn        | 0.988        | 0.572         | 2.478       | 0.017             | .0101                    | 0.621 | 0.775        | 3.993  | 13.060 |
| Detroit 562 | 0.508        | 0.431         | 1.839       | 0.053             | 0.046                    | 0.716 | 1.723        | 47.621 | 24.980 |
| Fadu        | 0.474        | 0.437         | 2.226       | 0.040             | 0.026                    | 0.349 | 0.652        | 29.944 | 16.256 |
| UM-SCC-6    | 0.668        | 0.408         | 1.828       | 0.008             | 0.912                    | 0.472 | 0.917        | 0.679  | 13.593 |
| UM-SCC-47   | 0.779        | 0.459         | 2.127       | 0.009             | 1.777                    | 0.513 | 1.076        | 1.171  | 18.340 |
| UPCI-SCC-90 | 1.562        | 0.717         | 3.842       | 0.016             | 1.905                    | 0.551 | 0.923        | 2.529  | 25.117 |
| 93-VU-147T  | 0.670        | 0.674         | 2.804       | 0.024             | 2.864                    | 0.620 | 1.375        | 20.679 | 15.749 |
